# Supplementary material
Source: PubMed Central journal article supplement (PMC3804422)
Supplement: NIHMS509672-supplement-Supplementary_data.pdf [file NIHMS509672-supplement-Supplementary_data.pdf]

**Materials and Methods.** All reagents were purchased from Sigma Aldrich and used without further purification, except for 3-mercaptopropyltriethoxysilane (MP-TES), which were purchased from Gelest. Thermogravimetric analysis (TGA) was carried out with a Shimadzu TGA-50 equipped with a platinum pan using a heating rate of 5 °C/min under air. A Hitachi 4700 Field Emission Scanning Electron Microscope (SEM) was used to determine particle size and morphology. A Cressington 108 Auto Sputter Coater equipped with an Au/Pd (80/20) target and MTM-10 thickness monitor was used to coat the sample with a thin conductive layer (~3 nm) before SEM imaging. Each SEM sample was prepared by suspending the nanoparticles in ethanol. A drop of the suspension was placed on a glass slide, and the solvent was allowed to evaporate. Gd<sup>3+</sup> ion concentration was measured using a Varian 820-MS inductively-coupled plasma mass spectrometer. Dynamic light scattering (DLS) and zeta potential measurements were carried out using a Malvern Instruments Zetasizer Nano. MR images were acquired on a Siemens 3T Biograph mMR scanner (Siemens Medical Systems, Erlangen, Germany) with an mMR Head/Neck coil. A 3D FLASH sequence was utilized to compute T<sub>1</sub> maps with seven different flip angles (2, 5, 10, 20, 30, 40, and 60). Imaging parameters were: FOV=190 x 190 x 64 mm<sup>3</sup>, matrix size= 128 x 128 x 32, TR/TE= 4.0/1.41 ms; total data acquisition time was less than 5 minutes. A 2-D multiple echo spin echo sequence was used to estimate T<sub>2</sub> maps. In total, 32 echoes with an echo spacing of 7.5 ms were obtained. The first echo time was 7.5 ms. TR was 3000 ms. FOV and matrix size were set to 190 x 190 mm<sup>2</sup> and 128 x 128. The slice thickness was 2 mm, and the total data acquisition time was about 4 min.

Cell Lines: H460 human non-small lung cancer cells (ATC# HTB-177) were purchased from the Tissue Culture Facility of the Lineberger Comprehensive Cancer Center at the University of North Carolina at Chapel Hill. AsPC-1 human pancreatic adenocarcinoma cells (ATCC# CRL-1682) were received from the laboratory of Jen Jen Yeh at the University of North Carolina at Chapel Hill. Both cell lines were maintained at 37 °C with 5% of CO<sub>2</sub>

and cultured in RPMI-1640 medium (Cellgro) with 10 % fetal bovine serum (Sigma) and 2 % penicillin/streptomycin (Sigma) according to ATCC recommendations. Murine monocyte cells (ATCC# TIB67) were purchased from the UNC Lineberger Comprehensive Cancer Center's Tissue Culture Facility. Cells were maintained in DMEM-H containing 10% FBS and 1% penicillin/streptomycin at 37 °C and 5% CO<sub>2</sub>.

Competitive binding assay. Confluent H-460 or AsPC-1 cells were trypsinized, and an aliquot of cell suspension was added to 7 mL RPMI-1640 media (Cellgro) in each 25 mL culture flask to obtain a cell density of  $1.0 \times 10^6$  cells/flask. The flasks (five total) were incubated (37 °C, 5% CO<sub>2</sub>) for 36 hours. To test the specific binding ability of the AA-PEG-PSQ-2 material, four of the cell culture flasks were then incubated in 5 mL fresh media containing the anisamide ligand (1 (two flasks), 5 and 10 mM) for 45 min. After that, the media was then removed and replaced with 5 mL fresh media containing either AA-PEG-PSQ-2 or PEG-PSQ-2 in a concentration of 100 µg/mL. The same procedure was followed for the cell culture flask (AA-PEG-PSQ-2) that were not incubated in the presence of anisamide ligand. The flasks were incubated (37 °C, 5 % CO<sub>2</sub>) for 12 hours; cells were trypsinized, and centrifuged at 3,000 rpm for 15 minutes to obtain cell pellets. The amount of Gd<sup>3+</sup> uptaken by AsPC-1 cells was determined by ICP-MS as described in the Experimental Section.

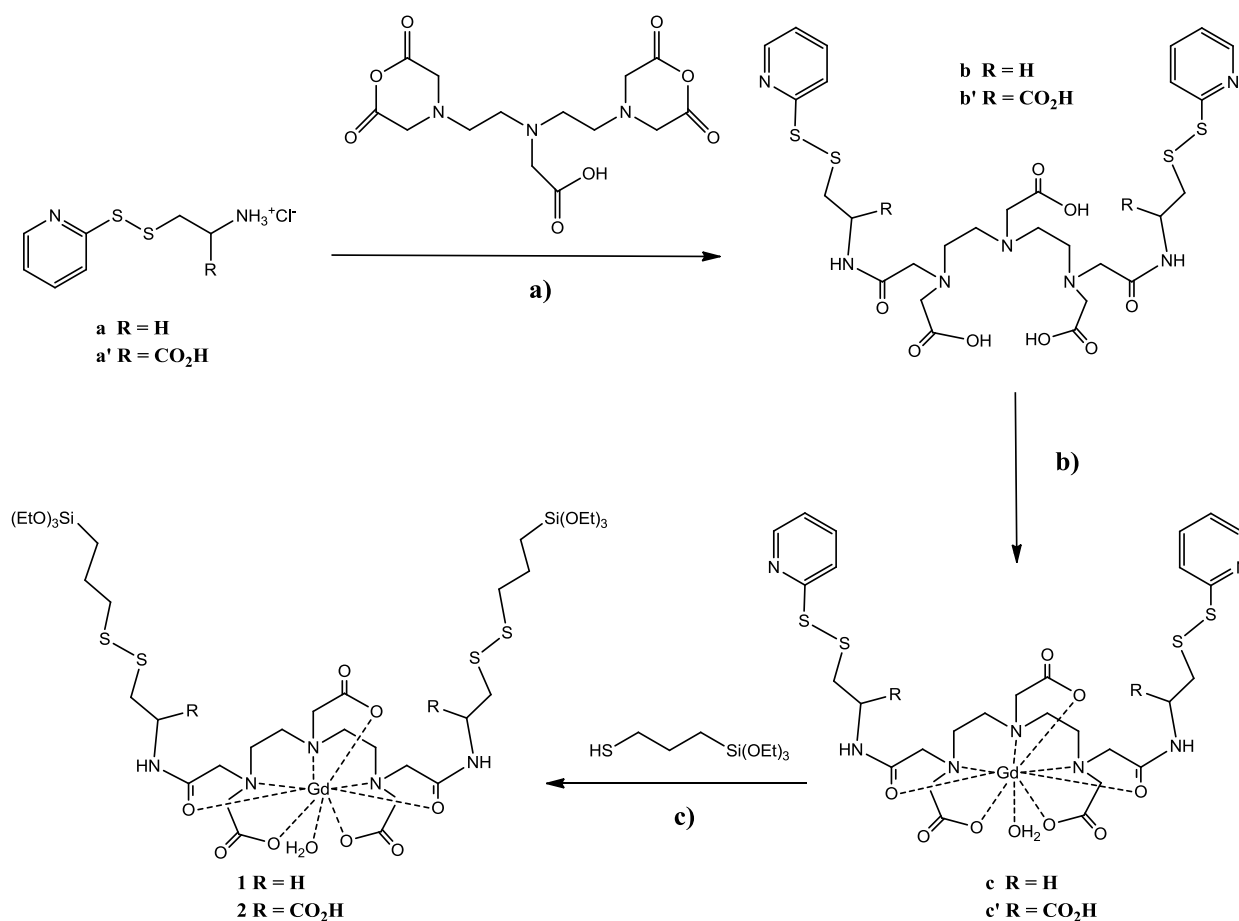

**Scheme S1.** Complexes **1** and **2** were synthesized by a multistep procedure. First, compound **a/a'** was obtained by a thiol displacement reaction with 2,2'-dipyridyl disulfide. **a)** The nucleophilic acyl addition of compound **a/a'** toward DTPA bis-anhydride affords compound **b/b'**. **b)** The metallation of compound **b/b'** with  $GdCl_3$  under basic conditions produces complex **c/c'**. **c)** A thiol displacement reaction of complex **c/c'** with mercaptopropyl triethoxysilane affords complex **1/2**.

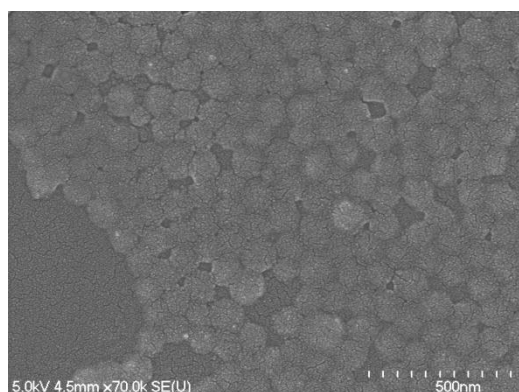

**Figure S1.** SEM image of PEG-PSQ-2 nanoparticles.

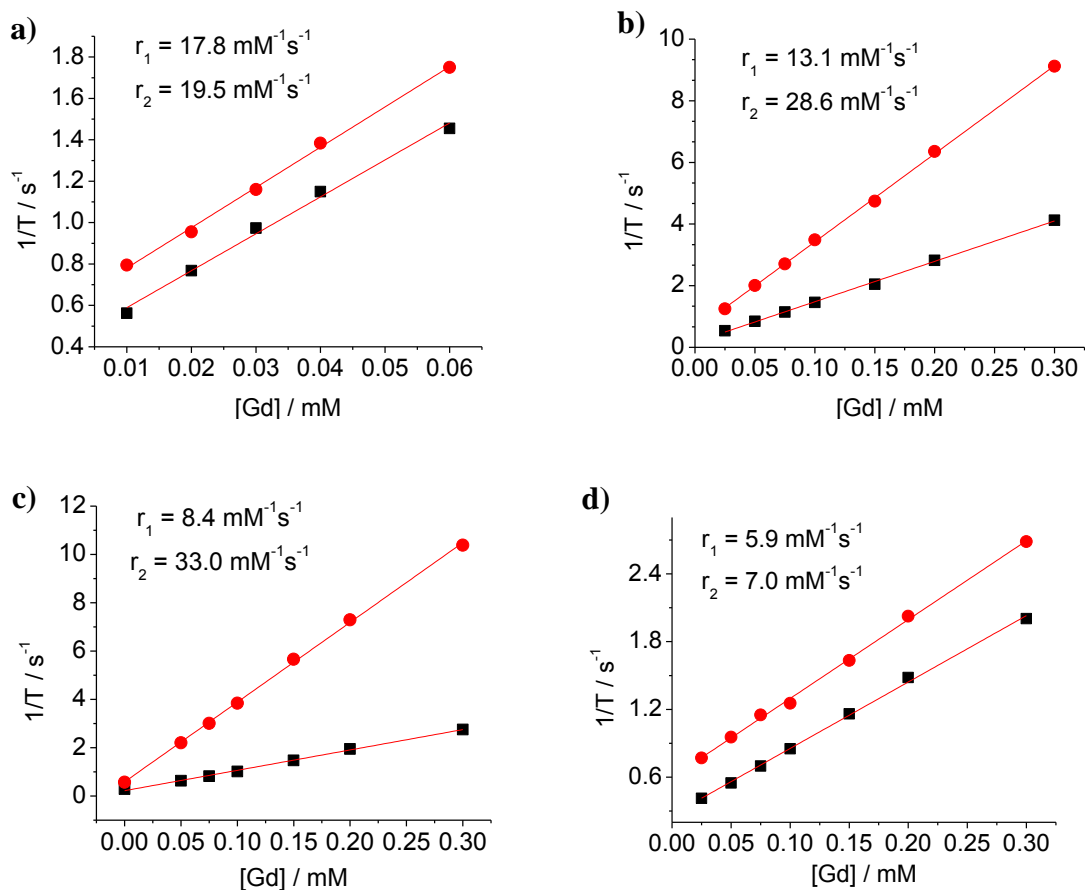

**Figure S2.** Longitudinal ( $r_1$ , squares) and transverse ( $r_2$ , circles) MR relaxivity plots for **a)** PSQ-1, **b)** PSQ-2, **c)** PEG-PSQ-2, and **d)** AA-PEG-PSQ-2.

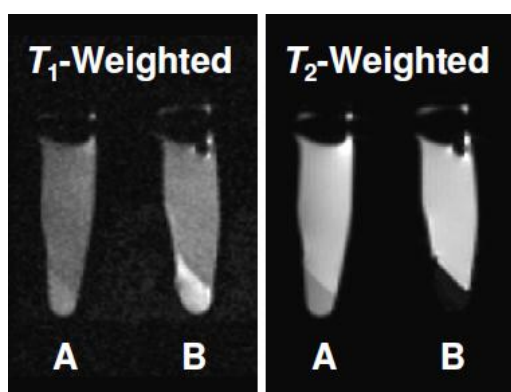

**Figure S3.**  $T_1$ - and  $T_2$ -weighted images of monocytes incubated with no nanoparticles (A) and PSQ-1 nanoparticles (B).

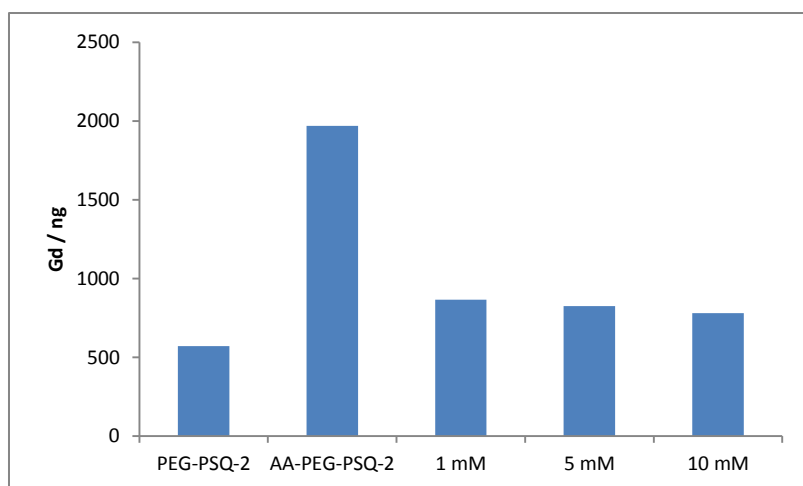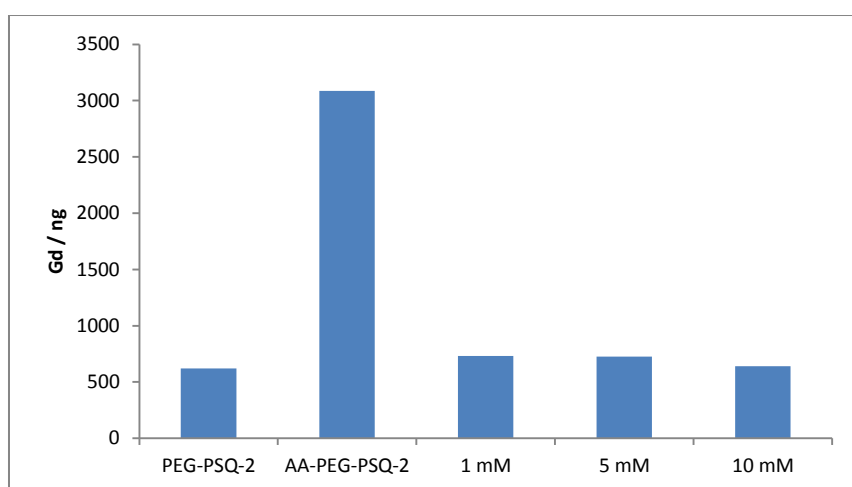

**Figure S4.** Anisamide competitive binding assays. The amounts of  $Gd^{3+}$  uptaken by H-460 (top) and AsPC-1 (bottom) cells were determined by ICP-MS. The graph shows the effects of the anisamide ligand on the uptake of AA-PEG-PSQ-2 as an indication that the internalization of this material is partially due to a receptor-specific endocytosis pathway. The first bar shows the internalization of PEG-PSQ-2 material in presence of 1 mM anisamide ligand. The second bar shows the internalization of AA-PEG-PSQ-2 material in the absence of anisamide ligand. The third, fourth, and fifth bars show the internalization of AA-PEG-PSQ-2 material by the cells that had been pre-incubated with the anisamide ligand at different concentrations (1, 5, and 10 mM, respectively).
